# Supplementary material
Source: publisher site journal article supplement (https://www.dovepress.com/article/423264)
Supplement: Supplementary file 1 [file get_supplementary_file.php]

**Supplementary Table 1. Antibodies used in this study.**

| antibodies | Host | Dilution  WB | Dilution IHC | Dilution  IF | Source |
| --- | --- | --- | --- | --- | --- |
| OPTN | Rabbit | 1:1000 |  | 1:200 | Proteintech |
| LC3-II/I | Rabbit | 1:500 |  |  | Abcam |
| TOMM20 | Mouse | 1:500 |  | 1:200 | Abcam |
| p-STAT3 | Mouse | 1:1000 |  |  | Cell Signaling |
| STAT3 | Mouse | 1:1000 |  |  | Cell Signaling |
| ZO-1 | Rabbit |  |  | 1:200 | Abcam |
| TNF-α | Rabbit | 1:500 | 1:100 |  | Proteintech |
| MPO | Mouse |  | 1:200 |  | Servicebio |
| GAPDH | Rabbit | 1:5000 |  |  | Proteintech |

**Supplement figure 1**


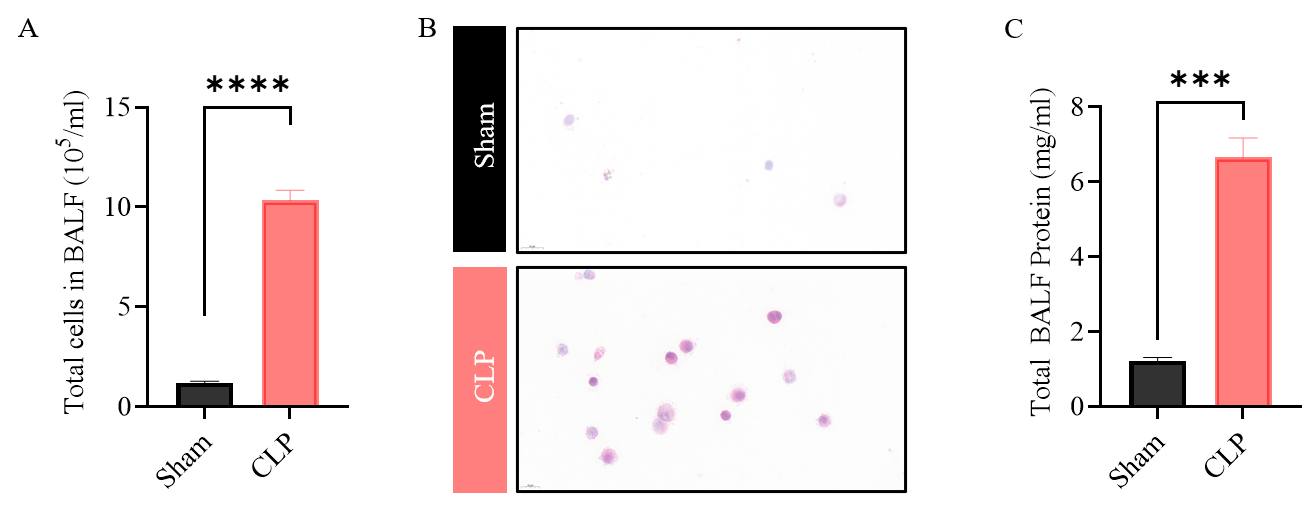


**Fig. S1 Total cells and protein were increased in the BALF of CLP induce ALI.**

(A-C) lung tissues from indicated groups were measured for total cells (A-B) and protein (C) in BALF. All data are shown as mean ± SEM. Unpaired Student’s t tests, ***, *p<*0.001, ****, *p<*0.0001.

**Supplement figure 2**


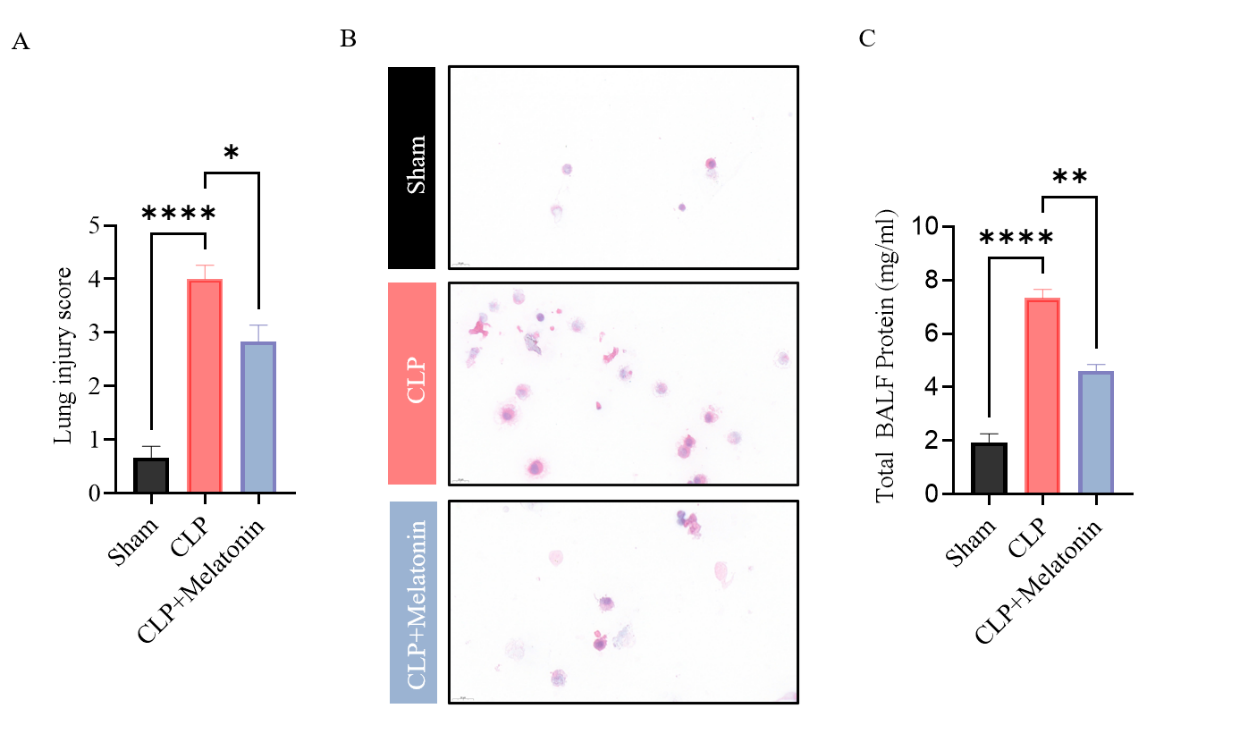


**Fig. S2 ALI induced by CLP were significantly attenuated by treatment with Melatonin.**

(A) Lung injury was scored and compared in each group. (B-C) lung tissues from indicated groups were measured for total cells (B) and protein (C) in BALF. All data are shown as mean ± SEM. One-way ANOVA test followed by Tukey’s post hoc test, ***, *p <* 0.05, **, *p<*0.01, ****, *p<*0.0001.
